# Supplementary material for: Personal glucose sensor for point-of-care early cancer diagnosis
Source: Royal Society of Chemistry journal article supplement (doi:10.1039/c2cc32729e), 2012-01-01
Supplement: c2cc32729e.pdf [file c2cc32729e.pdf]

## Supporting Information

### Personal glucose sensor for point-of-care early cancer diagnosis

Jiao Su, Jin Xu, Ying Chen, Yun Xiang,\* Ruo Yuan and Yaqin Chai

*Key Laboratory on Luminescence and Real-Time Analysis, Ministry of Education, School of Chemistry and Chemical Engineering, Southwest University, Chongqing 400715, P. R. China; Fax: +86-23-68252277; Tel: +86-23-68253172; E-mail: yunatswu@swu.edu.cn (Y.X.)*

#### Experimental Section

**Materials:** Bovine serum albumin (BSA), invertase from baker's yeast, sucrose and Tween 20 were received from Sigma (St. Louis, MO). Sulfo-NHS-LC-biotinylation kit and 3,3',5,5'-tetramethylbenzidine (TMB) were purchased from Pierce Biotechnology (Rockford, IL, USA). Streptavidin-coated magnetic beads (MyOne™ Streptavidin C1) were obtained from Invitrogen Corp. (Oslo, Norway). Primary CEA antibody (Ab<sub>1</sub>), biotin-conjugated secondary CEA antibody (biotin-Ab<sub>2</sub>), CEA, AFP, CA125, mouse IgG and the commercial CEA ELISA kit were all ordered from Biocell Co., Ltd (Zhengzhou, China). Human serum samples were provided by the 9<sup>th</sup> people's hospital of Chongqing (Chongqing, China). The PGS (Contour™TS) and test strips were from Bayer Healthcare LLC (Mishawaka, IN).

**Preparation of biotin-invertase:** It was reported that the reaction with amines of invertase would not affect the enzyme natural activity.<sup>1-3</sup> Biotin was conjugated to the amines of invertase by using a sulfo-NHS-LC-biotinylation kit. In brief, the sulfo-NHS-

LS-biotin (67  $\mu\text{L}$ , 10 mM) was added to an invertase solution (1 mL, 5mg mL<sup>-1</sup>). The mixture was incubated at room temperature for 1 h, followed by removal of excess biotin reagent and collection of the resulting biotin-invertase with a desalting column.

**PGS-based CEA assay protocol:** An aliquot (100  $\mu\text{L}$ , 10 mg mL<sup>-1</sup>) of the streptavidin coated magnetic beads (STV-MB) were washed twice with PBS and incubated with 100  $\mu\text{L}$  PBS buffer containing biotin-invertase (0.5 mg mL<sup>-1</sup>) and biton-Ab<sub>2</sub> (5  $\mu\text{g}$  mL<sup>-1</sup>) for 30 min. Then the invertase/Ab<sub>2</sub>-MB conjugates were separated, washed with PBS and resuspended in PBS-BSA (1 % BSA) for further use.

The 96 well polystyrene microplate (NUNC, Roskilde, Denmark) was first coated with Ab<sub>1</sub> antibody (10  $\mu\text{g}$  mL<sup>-1</sup>, 100  $\mu\text{L}$ , in carbonate buffer, PH 9.6) at 4°C overnight. The wells were then washed with 200  $\mu\text{L}$  PBST (0.01 % Tween-20) for three times and blocked with 200  $\mu\text{L}$  PBS-BSA. Next, 100  $\mu\text{L}$  of CEA solution at different concentration or serum samples were added to the wells. After incubation at 37 °C for 1 h, the wells were washed with PBST for three times. Subsequently, the invertase/Ab<sub>2</sub>-MB solution (100  $\mu\text{L}$ ) was incubated with the wells at 37 °C for 1 h, followed by washing with PBST. Finally, the sucrose solution (0.5 M, 100  $\mu\text{L}$ ) were added to the wells and allowed to react at 37 °C for 0.5 h. The enzymatically produced glucose was then monitored by the PGS.

#### References:

- 1 Y. Xiang, and Y. Lu , *Nat. Chem.*, 2011, **3**, 697..
- 2 A. Reddy, and F. Maley, *J. Biol. Chem.*, 1996, **271**, 13953.
- 3 M. Pita, M. Kr mer, J. Zhou, A. Poghossian, M. J. Sch ning, V. M. Fern ndez, and E. Katz, *ACS Nano*, 2008, **2**, 2160.
